# Supplementary material
Source: PubMed Central journal article supplement (PMC7785058)

# Supporting Information

## A Bacterial $\beta$ 1–3-Galactosyltransferase Enables Multigram-Scale Synthesis of Human Milk Lacto-*N*-tetraose (LNT) and Its Fucosides

John B. McArthur,<sup>†</sup> Hai Yu,<sup>†</sup> and Xi Chen\*

Department of Chemistry, University of California, One Shields Avenue, Davis, CA, 95616, United States

\*Corresponding author: E-mail: xiichen@ucdavis.edu; Tel: +1 530 7546037; Fax: +1 530 7528995

<sup>†</sup>These authors contributed similarly to this work.

### Table of Contents

|                                                                                                                                                                                                                               |         |
|-------------------------------------------------------------------------------------------------------------------------------------------------------------------------------------------------------------------------------|---------|
| <b>Figure S1.</b> Multiple sequence alignment of EcWbgO and four of its analogs ( <b>A</b> ) and the corresponding sequence identity matrix ( <b>B</b> ).....                                                                 | S2      |
| <b>Figure S2.</b> SDS-PAGE analysis of Cv $\beta$ 3GalT .....                                                                                                                                                                 | S3      |
| <b>Figure S3.</b> pH profiles of Cv $\beta$ 3GalT activity using LNT II- $\beta$ ProNHFmoc as the acceptor.....                                                                                                               | S3      |
| <b>Figure S4.</b> Effects of metal ions, EDTA, and DTT on the activity of Cv $\beta$ 3GalT.....                                                                                                                               | S3      |
| <b>Experimental section</b> .....                                                                                                                                                                                             | S4–S10  |
| Bacterial strains, plasmids, and materials.....                                                                                                                                                                               | S4      |
| Cloning.....                                                                                                                                                                                                                  | S4      |
| Cv $\beta$ 3GalT Synthetic DNA sequence.....                                                                                                                                                                                  | S4      |
| Cv $\beta$ 3GalT protein sequence.....                                                                                                                                                                                        | S4      |
| Overexpression and purification.....                                                                                                                                                                                          | S4–S5   |
| Bioreactor overexpression.....                                                                                                                                                                                                | S5      |
| Metal ion effect assays.....                                                                                                                                                                                                  | S5      |
| pH Profiles.....                                                                                                                                                                                                              | S5      |
| Kinetics .....                                                                                                                                                                                                                | S5–S6   |
| General methods for synthesis.....                                                                                                                                                                                            | S6      |
| Procedures for synthesis.....                                                                                                                                                                                                 | S6–S10  |
| <b>References</b> .....                                                                                                                                                                                                       | S10     |
| <sup>1</sup> H and <sup>13</sup> C NMR spectra of LNT II, LNT ( <b>1</b> ), LNFP II ( <b>2</b> ), S-LNF II ( <b>3</b> ), LNDFH I ( <b>4</b> ), LNFP V ( <b>5</b> ), DiFuc-LNT ( <b>6</b> ), and Fuc-LNT II ( <b>10</b> )..... | S11–S18 |

**A)**

```

Yiβ3GalT MGLIESINKMNNKRNPLVSVILPVYNSEKFLTEALLSIIIEQLYSNIEIIIIINDGSTDNS 60
EcWbgO MI-ID--EAESAESTHPVSVILPVNKKNPFLDEAINSILSQTFSSFEIIIVANCTDDF 57
Seβ3GalT -M-LT--EVRAVSTTKPLVSVILPVNKFNPYLDRAIHSILSQSYPSIELIIIANCTNDF 56
Yiβ3GalT -----MINNPLVSVVIVPNKHNPFLEAEISIQNQSYSNIEIILIANNCSDCF 48
Cvβ3GalT -----MDTIMIKRPLVSVILPVNKNPHLEEAIQSIKNQTYKELELIIIANCEDNF 52
          .*:***:** : : .* .*: ** .* : .:*:*: : : . :

Yiβ3GalT LEIIKYFQKRDRHRIKIIISRENRLVSSLNEGISNAEGDFIARMDDADDISAPDRIYKQLNY 120
EcWbgO YNELKHKV--NDKIKLIRTNIAIYLPYSLNKAIDLNGEFIARMDSDDISHPDRFTKQVDF 115
Seβ3GalT FDALKKRE--CETIKVLRNTNIAIYLPYCLNKGLDLCNGDFVARMDSDDISHPERIDRQVDF 114
Yiβ3GalT FNSLQEF--NEKTKLIRTDLSFLPFSNLGIHIANGEFIARMDSDDIADVDRIAKQVVY 106
Cvβ3GalT YSLLLKYQ--DQKTKIIRTSIKYLPFSLNLGVHLSQGEYIARMDSDDISVLDRIEKQVKR 110
          . : . *:: . * .** :. .*:::****:***: :*::*:

Yiβ3GalT ILANPSIDILGSNIEYINDSSEKIGESKYPLSNLQIRKTLPFWCCLAHPTILAKKSVFVA 180
EcWbgO LKNPPYVDVVGTAIFIDDKGREINKTKLPEENLDIVKNLPYKCCIVHPSVMFRKKVIAS 175
Seβ3GalT LINNPDIDVVGTAIVYIDEDDVELEKSNLPENNAIKKMLPYKCCLVHPSVMFRKNVVIS 174
Yiβ3GalT MRAHSDVAVVGSNVKFIIDERGIITGMSDYPISHRNIKRRMRYNCCVAHPSVMRRDVIK 166
Cvβ3GalT FLNTPELSILGSNVEYINEASESIGYSNYPLDHSSIVNSFPFRCNLAHPTIMVKKEVIT 170
          : : :*: * *::: . . * .: * . : : * :.*::: : :.*.

Yiβ3GalT HEQYKSKYRSEDEYELWLRRLRRNKIQFGMMRESLLKYRLHGSQMTDVKNLKLIVKSNLSL 240
EcWbgO IGGYMFSNYSEDEYELWNRLSLAK-IKFQNLPEYLFYRRLHEGQSTAKKNLYMVMVNDLVI 234
Seβ3GalT SGGYMFANYSEDEYELWNRLAVEG-RTFYNLSEYLLYRRLHNNQSTSKNNLFMVMVNDVAI 233
Yiβ3GalT AGGYMYGSLSEDEYDLWLRLLQDKNVVFHNINEPLLQYRIHANQATGKNLKYKIFYDLCL 226
Cvβ3GalT LGGYMYGSLSEDEYDLWIRASRHGNFKFSNIDPELLKYRIHKQATNKSNAYNIFAFDSSL 230
          * ****:* * * * : * * : * : * * . * * . * : . : :

Yiβ3GalT KMRELVLTRDIVLLGMLRDIISLVYSKVKTF 273
EcWbgO KMKCFFLTGNINYLFGGIRTIASFYCKYIK-- 265
Seβ3GalT KVKYFLLTKKVSYLLGIIRTVFSVFYCKYIK-- 264
Yiβ3GalT KLRFFLLYPNVFYFFGICIRGFLSYIYCRYIKK- 258
Cvβ3GalT KIREFLLNGNVQYLLGAARGFFAFLYVRFIKK- 262
          *:: :.* : : :*: * . : .* : .

```

**B)**

|          | EcWbgO | Cvβ3GalT | Ppβ3GalT | Seβ3GalT | Yiβ3GalT |
|----------|--------|----------|----------|----------|----------|
| EcWbgO   | -      | 45.38    | 49.22    | 63.26    | 41.13    |
| Cvβ3GalT | 45.38  | -        | 53.49    | 44.23    | 42.75    |
| Ppβ3GalT | 49.22  | 53.49    | -        | 46.48    | 39.15    |
| Seβ3GalT | 63.26  | 44.23    | 46.48    | -        | 37.12    |
| Yiβ3GalT | 41.13  | 42.75    | 39.15    | 37.12    | -        |

**Figure S1.** Multiple sequence alignment of EcWbgO and four of its analogs (A) and the corresponding sequence identity matrix (B).

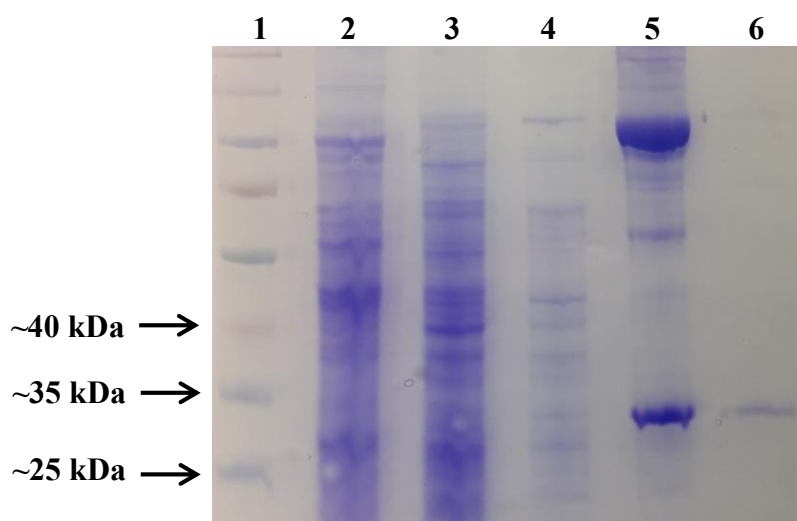

**Figure S2.** SDS-PAGE analysis of Cv $\beta$ 3GalT (theoretical MW 30 kDa). Lanes: 1, protein markers (Thermo Scientific Spectra multicolor broad range protein ladder); 2, whole cell extraction before induction; 3, whole cell extraction after induction; 4, cell lysate; 5, Ni<sup>2+</sup>-column-purified Cv $\beta$ 3GalT; and 6, purified Cv $\beta$ 3GalT after Ni<sup>2+</sup>-column and size exclusion column chromatography.

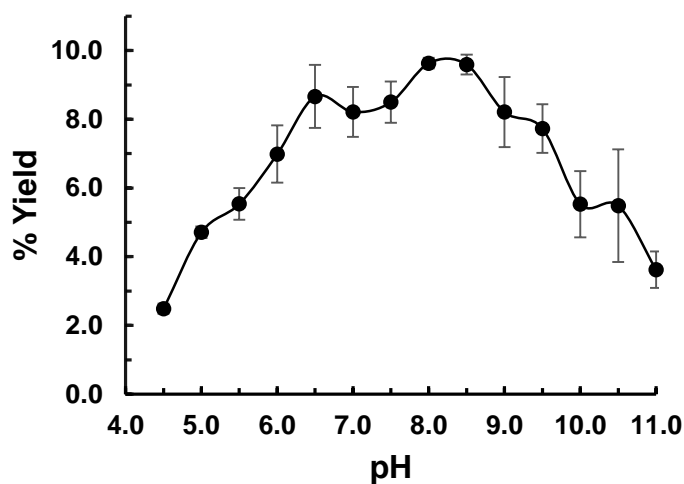

**Figure S3.** pH profile of Cv $\beta$ 3GalT activity using LNT II- $\beta$ ProNHFmoc as the acceptor. Buffers used were: MES, pH 4.5–6.5; Tris-HCl, pH 7.0–9.0; CAPS, pH 9.5–11.0.

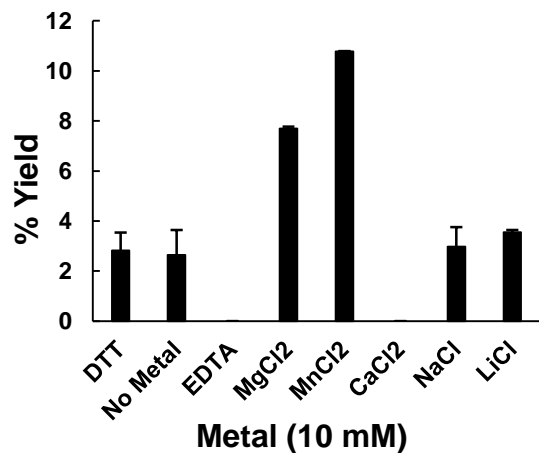

**Figure S4.** Effects of metal ions, EDTA, and DTT on the activity of Cv $\beta$ 3GalT.

## Experimental section

### *Bacterial strains, plasmids, and materials*

Chemically competent *E. coli* DH5 $\alpha$  and BL21 (DE3) cells were purchased from Invitrogen (Carlsbad, CA, USA). Vector pET22b(+) was purchased from EMD Millipore (Billerica, MA, USA). Nickel-nitrilotriacetic acid agarose (Ni<sup>2+</sup>-NTA agarose) was from Qiagen (Valencia, CA, USA).

### *Cloning*

The gene of Cv $\beta$ 3GalT optimized for *E. coli* expression was synthesized by Invitrogen and cloned into pET-22b(+) at the NdeI and Sall restriction sites using the following primers: 5'-AGATAACATATGGACACCATCATGATTAAACGTCCGCTGGTTAGCGTTATTCTGCCGG-3' (Cv $\beta$ 3GalT\_F) and 5'-ATGAAGGTCGACTTTTTTGGATGAAGCGCACATACAGAAATGCAAAAAACCACGTGCTGCCACCCAGC-3' (Cv $\beta$ 3GalT\_R). Polymer chain reactions (PCRs) were performed using a two-step procedure with Phusion DNA Polymerase. Cycling conditions were 30 second initial denaturation at 98 °C, thirty-five cycles of 10 seconds at 98 °C, and 45 seconds at 72 °C. The reaction was ended with a 10-minute final extension at 72 °C. Double digested PCR product and vector were ligated with T4 DNA ligase and transformed into chemically competent DH5 $\alpha$  cells. The plasmid was isolated by miniprep (Qiagen, CA) and transformed into chemically competent BL21(DE3) cells.

### *Cv $\beta$ 3GalT Synthetic DNA sequence*

```
ATGGACACCATCATGATTAAACGTCCGCTGGTTAGCGTTATTCTGCCGGTGAATAAAAAACAATCCGCA
TCTGGAAGAAGCAATCCAGAGCATTAAAAACCAGACCTATAAAGAGCTGGAAGTATGATTATTGCCA
ACAACGCGAGGATAACTTTTTATAGCCTGCTGCTGAAATATCAGGACCAGAAAACCAAATTTATCCGC
ACCAGCATCAAATATCTGCCGTTTAGCCTGAATCTGGGTGTTTCATCTGAGCCAGGGTGAATATATTGC
ACGTATGGATTCAGATGATATCAGCGTTCTGGATCGCATTGAAAAACAGGTTAAACGCTTTCTGAATA
CACCGGAAGTGAAGCATTCTGGGTAGCAATGTTGAATATATCAATGAAGCCAGCGAAAGCATTGGCTAT
AGCAACTATCCGCTGGATCATAGCAGCATTGTTAATAGCTTTCCGTTTCGTTGTAATCTGGCACATCC
GACCATTATGGTTAAAAAAGAAGTGATTACCACGCTTGGTGGCTATATGTATGGTAGCCTGAGCGAAG
ATTATGATCTGTGGATTCGTGCAAGCCGTCATGGCAATTTCAAATTTAGCAATATTGATGAACCGCTG
CTGAAGTACCGTATTCATAAAGGTCAGGCAACCAATAAAAGCAACGCCTATAACATCTTTGCCTTTGA
TAGCAGCCTGAAAATCCGTGAATTTCTGCTGAATGTAATGTGCAGTATCTGCTGGGTGCAGCACGTG
GTTTTTTTGCATTTCTGTATGTGCGCTTCATCAAAAA
```

### *Cv $\beta$ 3GalT Protein sequence*

```
MDTIMIKRPLVSVILPVNKNPHLEEIQSIKNQTYKELELIIIANNCEDNFYSLLLKYQDQKTKIIR
TSIKYLPFSLNLGVHLSQGEYIARMSDDISVLDRIEKQVKRFLNTPELSI LGSNVEYINEASESIGY
SNYPLDHSSIVNSFPFRCNLAHPTIMVKKEVITTLGGYMGSLSEYDLWIRASRHGNFKFSNIDEPL
LKYRIHKGQATNKSNAYNIFAFDSSLKIREFLLNGNVQYLLGAARGFFAFLYVRFIKK
```

### *Overexpression and purification*

Flasks (4 L) containing 1 L of autoclaved LB media supplemented with ampicillin (0.1 mg mL<sup>-1</sup>) were inoculated with 1 mL of overnight cultured *E. coli* BL21(DE3) cells harboring the plasmid. The 1 L cultures were grown at 37 °C until OD<sub>600 nm</sub> reached 0.6 to 1.0, then expression was induced with isopropyl  $\beta$ -D-1-thiogalactoside (IPTG) with a final concentration of 1 mM and the cells were shaken at 20 °C and 250 rpm for overnight (20 h). Cells were harvested by centrifugation at 5000  $\times$  g for 20 minutes, resuspended in 20 mL of Tris-HCl (pH 7.5, 100 mM) and lysed by sonication with the following method: amplitude at 65%, 10 s pulse on and 30 s pulse off for 18 cycles. The lysate was collected after centrifugation at 8000 pm for 30 minutes and then loaded onto a Ni<sup>2+</sup>-NTA affinity column at 4 °C that

was pre-equilibrated with 6 column volumes of binding buffer (50 mM Tris-HCl buffer, pH 7.5, 10 mM imidazole, 0.5 M NaCl). The column was washed with 10 column volumes of binding buffer and 10 column volumes of washing buffer (50 mM of Tris-HCl buffer, pH 7.5, 50 mM of imidazole, 0.5 M of NaCl) sequentially to wash away the nonspecific binding protein. The target protein was eluted using Tris-HCl buffer (50 mM, pH 7.5) containing 200 mM imidazole and 0.5 M NaCl. Fractions containing the purified protein were combined. For storage at -20 °C, 50% glycerol was added to a final concentration of 10% glycerol.

For further purification, Ni<sup>2+</sup>-column-purified protein was subjected to a size exclusion column chromatography using a NGC Quest 10 Chromatography System (Bio-Rad) with an ENrich SEC 650 10 × 300 column (Bio-Rad). Tris-HCl buffer (50 mM, pH 7.5) supplemented with NaCl (200 mM) was used as the eluent at a constant flow rate of 1 mL min<sup>-1</sup>.

### ***Bioreactor overexpression***

The bioreactor (Eppendorf BioFlo 120 with a 5 L Fermentation Vessel) contained 5 L of autoclaved LB media supplemented with ampicillin (0.1 mg mL<sup>-1</sup>) and Antifoam 204 (Sigma, 200 µL). It was inoculated with 100 mL of overnight culture of *E. coli* BL21(DE3) cells harboring the plasmid. The cells were grown at 37 °C and 500 rpm agitation with air flow at 5 SPLM and its pH maintained between 6.9 and 7.1 until OD<sub>600 nm</sub> reached 1.0. The expression was induced with IPTG to a final concentration of 1 mM and the cells were further cultured at 20 °C for overnight (20 h). Purification was performed in the same manner as described for the shake flask expression.

### ***pH Profiles***

Reactions were performed in duplicate at 37 °C for 30 minutes in a buffer (100 mM) selected from (MES for pH 4.5–6.5; Tris-HCl for pH 7.0–9.0; or CAPS for pH 9.5–11.0) containing MnCl<sub>2</sub> (10 mM), LNT II-βProNHFmoc (0.5 mM), and UDP-Gal (2 mM). Reactions were stopped by heat denaturation at 70 °C for 10 minutes. The mixtures were incubated at 4 °C and centrifuged at 13,000 rpm for 5 minutes. Supernatants were analyzed using an Infinity 1290-II HPLC equipped with a ZORBAX Eclipse Plus C18 Rapid Resolution HD column (1.8 µm particle, 2.1 × 50 mm, Agilent Technologies, CA) and a UV-Vis detector (Agilent Technologies, CA) monitored at A<sub>315 nm</sub>. An isocratic flow of 0.5 mL min<sup>-1</sup> for a 30% acetonitrile and 70% aqueous solution containing 0.1% TFA was used for elution.

### ***Metal ion effect assays***

Reactions were performed in duplicate at 37 °C for 1 h in Tris-HCl buffer (100 mM, pH 7.0) containing GlcNAcβpNP (5 mM), and UDP-Gal (15 mM) in the presence or the absence of dithiothreitol (DTT, 10 mM), ethylenediaminetetraacetic acid (EDTA, 10 mM), or a metal salt (10 mM) selected from MgCl<sub>2</sub>, MnCl<sub>2</sub>, CaCl<sub>2</sub>, NaCl, or LiCl. Reactions were stopped by heat denaturation at 70 °C for 10 minutes. The mixtures were incubated at 4 °C and centrifuged at 13,000 rpm for 5 minutes. Supernatants were analyzed similarly as described above for pH profile studies except for a different eluant (an isocratic flow of 0.5 mL min<sup>-1</sup> for a 20% acetonitrile and 80% aqueous solution containing 0.1% TFA) was used.

### ***Kinetics***

Reactions were performed in duplicate at 37 °C for 30 minutes in Tris-HCl buffer (100 mM, pH 7.5) containing MnCl<sub>2</sub> (10 mM), Cvβ3GalT (9.4 nM for variable LNT II-βProNHFmoc, 94 nM for variable UDP-Gal), a fixed concentration of UDP-Gal (5 mM) or LNT II-βProNHFmoc (2 mM) with varying concentrations (0.2, 0.5, 1.0, 2.0, and 5.0 mM) of LNT II-βProNHFmoc or UDP-Gal, respectively. Reactions were stopped by heat denaturation at 70 °C for 10 minutes. The mixtures were incubated at 4 °C and centrifuged at 13,000 rpm for 5 minutes. The reactions were analyzed similarly as described above for pH profile studies. The apparent kinetic parameters were obtained by fitting the experimental

data into the Michaelis-Menten equation using Grafit 5.0.

### **General methods for synthesis**

Chemicals were purchased and used without further purification.  $^1\text{H}$  NMR (800 MHz) and  $^{13}\text{C}$  NMR (200 MHz) spectra were recorded on a Bruker Avance-800 NMR spectrometer. High resolution electrospray ionization (ESI) mass spectra were obtained using Thermo Electron LTQ-Orbitrap Hybrid MS at the Mass Spectrometry Facility in the University of California, Davis. Silica gel 60 Å (230–400 mesh, Sorbent Technologies) was used for flash column chromatography. Thin-layer chromatography (TLC, Sorbent Technologies) was performed on silica gel plates using anisaldehyde sugar stain for detection. Gel filtration chromatography was performed with a column (100 cm  $\times$  2.5 cm) packed with Bio-Gel P-2 Fine resins (Bio-Rad, Hercules, California, USA). D-Galactose (Gal) and D-lactose (Lac) were purchased from Fisher Scientific (Pittsburgh, Pennsylvania, USA). D-GalNAc was from Carbosynth US. L-Fucose (Fuc) was from V-LABS (Covington, USA). Neu5Ac were bought from NingBo Hongxiang Bio-Chem (Ningbo, China). ATP, UTP, CTP, and GTP were bought from Hangzhou Meiya Pharmacy (Hangzhou, China). Recombinant enzymes Recombinant enzymes *Bifidobacterium longum* strain ATCC55813 *N*-acetylhexosamine-1-kinase (BLNahK),<sup>1</sup> *Pasteurella multocida* *N*-acetylglucosamine uridylyltransferase (PmGlmU),<sup>2</sup> *Pasteurella multocida* inorganic pyrophosphatase (PmPpA),<sup>3</sup> *Neisseria meningitidis*  $\beta$ 1–3-*N*-acetylglucosaminyltransferase (NmLgtA),<sup>4</sup> *Streptococcus pneumoniae* TIGR4 galactokinase (SpGalK),<sup>5</sup> *Bifidobacterium longum* UDP-sugar pyrophosphorylase (BLUSP),<sup>6</sup> *Neisseria meningitidis* CMP-sialic acid synthetase (NmCSS),<sup>7</sup> *Pasteurella multocida*  $\alpha$ 2–3-sialyltransferase 1 M144D mutant (PmST1 M144D),<sup>8</sup> *Bacteroides fragilis* strain NCTC9343 bifunctional L-fucokinase/GDP-fucose pyrophosphorylase (BfFKP),<sup>9</sup> *Helicobacter pylori*  $\alpha$ 1–3/4-fucosyltransferase (Hp3/4FT),<sup>10</sup> *Thermosynechococcus elongates*  $\alpha$ 1–2-fucosyltransferase (Te2FT),<sup>11</sup> and *Escherichia coli* O126  $\alpha$ 1–2-fucosyltransferase (EcWbgL)<sup>12</sup> were expressed and purified as described previously.

### **Synthesis of LNT II GlcNAc $\beta$ 3Gal $\beta$ 4Glc**

A reaction mixture (70 mL) in Tris-HCl buffer (100 mM, pH 8.0) containing lactose (1.0 g, 2.92 mmol), GlcNAc (0.775 g, 3.51 mmol), ATP (2.09 g, 3.80 mmol), UTP (2.01 g, 3.80 mmol),  $\text{MgCl}_2$  (20 mM), BLNahK (9.0 mg), PmGlmU (8.0 mg), PmPpA (4.0 mg), and NmLgtA (5.0 mg) was incubated in an incubator shaker at 30 °C for 72 h with shaking (100 rpm). The reaction progress was monitored by thin-layer chromatography (TLC) (*i*-PrOH:H<sub>2</sub>O:NH<sub>3</sub>:H<sub>2</sub>O = 7:2:1, by volume, detected with *p*-anisaldehyde sugar stain) and mass spectrometry (MS). Upon completion, pre-cooled ethanol (70 mL) was added and the mixture was incubated at 4 °C for 1 h. After centrifugation (4300  $\times$  g), the supernatant was concentrated and passed through a Bio-Gel P-2 gel filtration column (2.5 cm  $\times$  80 cm, water was used as an eluant). The fractions containing the product were collected, concentrated, and further purified by the Bio-Gel P-2 column again to obtain trisaccharide LNT II (1.54 g, 97%).  $^1\text{H}$  NMR (800 MHz, D<sub>2</sub>O)  $\delta$  5.16 (d, *J* = 4.0 Hz, 0.4H), 4.62 (d, *J* = 8.0 Hz, 0.4H), 4.61 (d, *J* = 8.0 Hz, 0.6H), 4.60 (d, *J* = 8.0 Hz, 0.6H), 4.38 (d, *J* = 8.0 Hz, 1H), 4.09 (d, *J* = 3.2 Hz, 1H), 3.91–3.19 (m, 17H), 1.98 (s, 3H).  $^{13}\text{C}$  NMR (200 MHz, D<sub>2</sub>O)  $\delta$  174.80, 102.75, 102.72, 95.57, 91.64, 81.78, 81.76, 78.12, 78.02, 75.48, 74.72, 74.63, 74.17, 73.60, 73.37, 71.23, 70.94, 69.95, 69.86, 69.83, 69.48, 68.21, 68.18, 62.08, 60.81, 60.28, 59.87, 59.74, 55.47, 21.98. HRMS (ESI) *m/z* calculated for C<sub>20</sub>H<sub>35</sub>NNaO<sub>16</sub> [M+Na]<sup>+</sup> 568.1854, found 568.1864.

### **Synthesis of LNT (I) Gal $\beta$ 3GlcNAc $\beta$ 3Gal $\beta$ 4Glc**

A reaction mixture (8 mL) in Tris-HCl buffer (100 mM, pH 8.0) containing LNT II (100 mg, 0.18 mmol), galactose (43 mg, 0.24 mmol), ATP (132 mg, 0.24 mmol), UTP (0.127 g, 0.24 mmol),  $\text{MgCl}_2$  (20 mM), SpGalK (2 mg), BLUSP (2 mg), PmPpA (2 mg), and Cv $\beta$ 3GalT (1.5 mg) was incubated in an incubator

shaker at 37 °C for 30 h with shaking (100 rpm). The product formation was monitored by TLC (*n*-PrOH:H<sub>2</sub>O:NH<sub>3</sub>:H<sub>2</sub>O = 5:2:1, by volume, detected with *p*-anisaldehyde sugar stain) and mass spectrometry (MS). When an optimal yield was achieved, pre-cooled ethanol (80 mL) was added and the mixture was incubated at 4 °C for 30 min. The precipitates were removed by centrifugation and the supernatant was concentrated (4300 × g) and purified by a Bio-Gel P-2 gel column (2.5 cm × 80 cm, water was the eluent) to obtain LNT (0.13 g, 99%). <sup>1</sup>H NMR (800 MHz, D<sub>2</sub>O) δ 5.22 (d, *J* = 4.0 Hz, 0.3H), 4.74 (d, *J* = 8.0 Hz, 0.3H), 4.73 (d, *J* = 8.0 Hz, 0.7H), 4.67 (d, *J* = 8.0 Hz, 0.7H), 4.44 (d, *J* = 8.0 Hz, 2H), 4.16 (d, *J* = 3.2 Hz, 1H), 3.97–3.27 (m, 23H), 2.03 (s, 3H). <sup>13</sup>C NMR (200 MHz, D<sub>2</sub>O) δ 174.87, 103.39, 102.83, 102.79, 102.46, 95.64, 91.72, 81.97, 81.89, 81.86, 78.30, 78.20, 75.18, 75.09, 74.80, 74.70, 74.26, 73.69, 72.37, 71.31, 71.04, 70.58, 70.03, 69.94, 69.91, 68.44, 68.36, 68.25, 68.23, 60.94, 60.89, 60.87, 60.41, 59.99, 59.86, 54.61, 22.14. HRMS (ESI) *m/z* calculated for C<sub>26</sub>H<sub>45</sub>NNaO<sub>21</sub> [M+Na]<sup>+</sup> 730.2382, found 730.2397.

### ***Sequential OPME 10-gram-scale synthesis of LNT (1) Galβ3GlcNAcβ3Galβ4Glc***

A reaction mixture (500 mL) in Tris-HCl buffer (100 mM, pH 8.0) containing lactose monohydrate (10.0 g, 27.7 mmol, 55.5 mM), GlcNAc (7.4 g, 33.4 mmol), ATP (20.7 g, 37.5 mmol), UTP (19.8 g, 37.5 mmol), MgCl<sub>2</sub> (20 mM), BINahK (90.0 mg), PmGlmU (75 mg), NmLgtA (70 mg), and PmPpA (60 mg) was incubated in an incubator shaker at 30 °C with shaking (100 rpm). Additional NmLgtA (30 mg) was added in day 3. The reaction progress was monitored by TLC and MS until the reaction was complete (~7 days). The reaction mixture was then concentrated and used directly for the next step of OPME reaction without purification.

The volume of the above reaction was decreased to 200 mL by blowing air to the container. Galactose (6.5 g, 36.1 mmol), ATP (20.7 g, 37.5 mmol), UTP (19.8 g, 37.5 mmol), SpGalK (80 mg), BLUSP (90 mg), PmPpA (47 mg), Cvβ3GalT (77 mg) were added and the final volume of the mixture was adjusted to 500 mL and the pH of the solution was adjusted to 8.0 using 4 N of NaOH. The reaction mixture was incubated in an incubator shaker at 30 °C for 6 days with shaking (100 rpm). The product formation was monitored by mass spectrometry. When the LNT II was completely consumed, the reaction mixture was incubated in a boiling water bath for 15 minutes. The precipitates were removed by centrifugation at 4300 × g for 20 min and the supernatant was concentrated to 200 mL by blowing air to the container. A solution of 16 mL (1/12.5 of the total sample volume) was loaded to Dowex 1 × 8-200 (formate form) anion exchange column (40 cm × 2.5 cm). The product was eluted with H<sub>2</sub>O (250 mL) and monitored by TLC (*i*-PrOH:H<sub>2</sub>O:NH<sub>3</sub>:H<sub>2</sub>O = 5:2:1, by volume, detected with *p*-anisaldehyde sugar stain). Product-containing fractions were combined and evaporated under vacuum to produce the crude LNT which was dissolved in H<sub>2</sub>O and purified further by a Bio-Gel P-2 fine column (90 cm × 2.5 cm, water as the eluent) to produce 1.56 g of pure LNT (1). The remaining of the reaction mixture was purified similarly. The total yield of synthesizing LNT (1) from Lac using combined OPME glycosylation reactions was 99.3%.

### ***Synthesis of LNFP II (2) Galβ3(Fucα4)GlcNAcβ3Galβ4Glc***

A reaction mixture (30 mL) in Tris-HCl buffer (100 mM, pH 7.5) containing LNT (1) (500 mg, 0.71 mmol), L-fucose (128 mg, 0.78 mmol), ATP (467 mg, 0.85 mmol), GTP (481 mg, 0.85 mmol), MgCl<sub>2</sub> (20 mM), BfFKP (10 mg), PmPpA (4.5 mg), and Hp3/4FT (5 mg) was incubated at 30 °C for 2 days with shaking (100 rpm). Upon the completion of the reaction, pre-cooled ethanol (30 mL) was added and the mixture was incubated at 4 °C for 1 h. After centrifugation, the supernatant was concentrated and passed through a Bio-Gel P-2 gel filtration column (water was used as an eluant) to give the LNFP II (2) (488 mg, 81%). <sup>1</sup>H NMR (800 MHz, D<sub>2</sub>O) δ 5.20 (d, *J* = 4.0 Hz, 0.4 H), 5.11 (d, *J* = 4.0 Hz, 0.4 H), 5.01 (d, *J* = 4.0 Hz, 0.6 H), 4.88–4.85 (m, 0.6 H), 4.84–4.82 (m, 0.4 H), 4.70–4.68 (m, 1 H), 4.64 (d, *J* = 8.0 Hz, 0.6 H), 4.49 (d, *J* = 8.0 Hz, 0.6 H), 4.44 (d, *J* = 8.0 Hz, 0.4 H), 4.42 (d, *J* = 8.0 Hz, 1 H), 4.14 (d, *J* = 3.2 Hz, 1H), 4.08–3.25 (m, 26 H), 2.02–2.02 (m, 3 H), 1.17–1.16 (m, 3H); <sup>13</sup>C NMR (200 MHz,

D<sub>2</sub>O)  $\delta$  174.65, 174.58, 102.81, 102.78, 102.74, 102.52, 101.65, 98.49, 97.90, 95.61, 91.69, 81.95, 81.93, 78.24, 78.22, 78.14, 78.12, 75.78, 75.09, 74.99, 74.80, 74.76, 74.75, 74.69, 74.68, 74.63, 74.23, 73.66, 72.93, 72.34, 72.19, 72.00, 71.83, 71.79, 71.28, 71.00, 70.93, 70.37, 70.00, 69.87, 69.84, 69.07, 69.01, 68.23, 68.22, 68.19, 67.67, 67.58, 66.73, 66.57, 61.54, 61.39, 60.86, 60.85, 59.95, 59.82, 59.51, 59.47, 59.24, 55.75, 22.17, 22.13, 15.26, 15.19. HRMS (ESI)  $m/z$  calculated for C<sub>32</sub>H<sub>55</sub>NNaO<sub>25</sub> [M+Na]<sup>+</sup> 876.2961, found 876.2955.

### ***Synthesis of S-LNF II (3) Neu5Ac $\alpha$ 3Gal $\beta$ 3(Fuc $\alpha$ 4)GlcNAc $\beta$ 3Gal $\beta$ 4Glc***

A reaction mixture (30 mL) in Tris-HCl buffer (100 mM, pH 8.5) containing LNFP II (**2**) (19 mg, 0.022 mmol, 5 mM), *N*-acetylneuraminic acid (Neu5Ac, 10 mg, 0.033 mmol), CTP (18 mg, 0.033 mmol), MgCl<sub>2</sub> (20 mM), NmCSS (0.5 mg), and PmST1 M144D (1 mg) was incubated at 30 °C for 2 days with shaking (100 rpm). The progress was monitored by TLC and MS. Upon the completion of the reaction, pre-cooled ethanol (30 mL) was added and the mixture was incubated at 4 °C for 1 h. After centrifugation, the supernatant was concentrated and passed through a Bio-Gel P-2 gel filtration column (2.5 cm  $\times$  80 cm, water was used as an eluant). The fractions containing the product were collected, concentrated, and further purified by HPLC using a C18 column to produce pure S-LNF II (**3**) (21 mg, yield 81%) as a white powder. <sup>1</sup>H NMR (800 MHz, D<sub>2</sub>O)  $\delta$  5.21 (d,  $J$  = 4.0 Hz, 0.4H), 5.17 (d,  $J$  = 3.2 Hz, 0.4H), 5.11 (d,  $J$  = 4.0 Hz, 0.6H), 4.81–4.80 (m, 1H), 4.68 (d,  $J$  = 8.0 Hz, 0.6H), 4.65 (d,  $J$  = 8.0 Hz, 0.6H), 4.64 (d,  $J$  = 8.0 Hz, 0.4H), 4.54 (d,  $J$  = 8.0 Hz, 0.4H), 4.51 (d,  $J$  = 8.0 Hz, 0.6H), 4.42 (d,  $J$  = 8.0 Hz, 0.6H), 4.40 (d,  $J$  = 8.0 Hz, 0.4H), 4.15–4.06 (m, 2H), 3.97–3.26 (m, 33H), 2.77–2.73 (m, 1H), 2.03 (s, 6H), 1.80–1.76 (m, 1H), 1.17 (d,  $J$  = 6.4 Hz, 3H). <sup>13</sup>C NMR (200 MHz, D<sub>2</sub>O)  $\delta$  175.00, 174.98, 174.84, 174.66, 173.84, 102.90, 102.50, 101.70, 101.54, 100.68, 99.75, 99.63, 98.55, 98.40, 95.81, 95.70, 82.07, 82.05, 78.34, 78.23, 77.99, 76.97, 75.63, 75.52, 75.45, 75.34, 75.14, 75.00, 74.96, 74.89, 74.86, 74.77, 74.62, 74.49, 74.32, 73.75, 73.01, 72.88, 72.86, 72.69, 72.65, 72.35, 72.23, 72.06, 71.88, 71.83, 71.74, 71.37, 71.09, 70.94, 70.92, 70.09, 69.96, 69.94, 69.36, 69.24, 69.18, 69.15, 68.32, 68.28, 68.23, 68.07, 68.05, 67.77, 67.68, 67.44, 67.28, 66.63, 66.47, 62.59, 62.56, 62.54, 61.47, 61.01, 60.96, 60.04, 59.91, 59.49, 55.13, 51.67, 51.65, 39.76, 39.60, 22.24, 22.22, 22.13, 22.01, 15.36, 15.25. HRMS (ESI)  $m/z$  calculated for C<sub>43</sub>H<sub>71</sub>N<sub>2</sub>O<sub>33</sub> [M-H]<sup>-</sup> 1143.3945, found 1143.3927.

### ***Synthesis of LNDFH I (4) Fuc $\alpha$ 2Gal $\beta$ 3(Fuc $\alpha$ 4)GlcNAc $\beta$ 3Gal $\beta$ 4Glc***

LNFP I (**8**) was synthesized as described previously.<sup>11</sup> For the synthesis of LNDFH I (**4**), a reaction mixture (8 mL) in Tris-HCl buffer (100 mM, pH 7.5) containing LNFP I (**8**) (100 mg, 0.12 mmol), L-fucose (38 mg, 0.23 mmol), ATP (161 mg, 0.30 mmol), GTP (166 mg, 0.30 mmol), MgCl<sub>2</sub> (20 mM), BfFKP (2 mg), PmPpA (1.5 mg), and Hp3/4FT (2 mg) was incubated at 30 °C for 2 days with shaking (100 rpm). Upon the completion of the reaction as monitored by TLC and MS, pre-cooled ethanol (8 mL) was added and the mixture was incubated at 4 °C for 1 h. After centrifugation (4300  $\times$  g), the supernatant was concentrated and passed through a Bio-Gel P-2 gel filtration column (2.5 cm  $\times$  80 cm, water was used as an eluant) to produce pure LNDFH I (**4**) (107 mg, 92%). <sup>1</sup>H NMR (800 MHz, D<sub>2</sub>O)  $\delta$  5.21 (d,  $J$  = 4.0 Hz, 0.4H), 5.14 (d,  $J$  = 4.0 Hz, 1H), 5.01 (d,  $J$  = 4.0 Hz, 1H), 4.88–4.84 (m, 2H), 4.65 (d,  $J$  = 8.0 Hz, 1.6H), 4.60 (d,  $J$  = 8.0 Hz, 1H), 4.41 (d,  $J$  = 8.0 Hz, 1 H), 4.33 (dd,  $J$  = 6.4 and 13.6 Hz, 1H), 4.14–4.11 (m, 2H), 3.94–3.25 (m, 27H), 2.05 (s, 3H), 1.26 (d,  $J$  = 7.2 Hz, 3H), 1.25 (d,  $J$  = 6.4 Hz, 3H); <sup>13</sup>C NMR (200 MHz, D<sub>2</sub>O)  $\delta$  174.09, 103.12, 102.86, 102.83, 100.52, 100.49, 99.46, 99.43, 97.66, 95.63, 95.60, 91.71, 91.68, 81.43, 78.13, 78.02, 76.38, 75.04, 74.70, 74.61, 74.35, 74.21, 73.67, 73.51, 71.91, 71.86, 71.66, 71.01, 70.06, 69.32, 69.00, 68.65, 68.60, 68.52, 68.17, 67.71, 66.93, 66.90, 66.14, 66.11, 61.48, 61.34, 60.87, 59.23, 59.21, 59.19, 55.65, 22.09, 15.26, 15.21. HRMS (ESI)  $m/z$  calculated for C<sub>38</sub>H<sub>65</sub>NNaO<sub>29</sub> [M+Na]<sup>+</sup> 1022.3540, found 1022.3577.

### ***Synthesis of Fuc-LNT II (10) GlcNAc $\beta$ 3Gal $\beta$ 4(Fuc $\alpha$ 3)Glc***



A reaction mixture (20 mL) in Tris-HCl buffer (100 mM, pH 7.5) containing trisaccharide LNT II (300 mg, 0.55 mmol), L-fucose (135 mg, 0.82 mmol), ATP (485 mg, 0.88 mmol), and GTP (499 mg, 0.88 mmol) were dissolved MgCl<sub>2</sub> (20 mM), FKP (6.0 mg), Hp3/4FT (5.5 mg), and PmPpA (4.0 mg) was incubated in an incubator shaker at 30 °C for 48 h with shaking (100 rpm). The product formation was monitored by TLC (*n*-PrOH:H<sub>2</sub>O:NH<sub>3</sub>:H<sub>2</sub>O = 4:2:1, by volume, detected with *p*-anisaldehyde sugar stain) and mass spectrometry (MS). Upon the completion of the reaction, pre-cooled ethanol (10 mL) was added and the mixture was incubated at 4 °C for 1 h. The precipitates were removed by centrifugation (4300 × *g*) and the supernatant was concentrated and purified by a Bio-Gel P-2 gel filtration column (2.5 cm × 80 cm, water was used as an eluant) to produce Fuc-LNT II (**10**) (373 mg, 98%). <sup>1</sup>H NMR (800 MHz, D<sub>2</sub>O) δ 5.42 (d, *J* = 4.0 Hz, 0.6 H), 5.36 (d, *J* = 4.0 Hz, 0.4 H), 5.17 (d, *J* = 4.0 Hz, 0.4 H), 4.82–4.78 (m, 1 H), 4.68 (d, *J* = 8.8 Hz, 0.4 H), 4.67 (d, *J* = 8.8 Hz, 0.6 H), 4.64 (d, *J* = 8.0 Hz, 0.6 H), 4.41 (d, *J* = 8.0 Hz, 1 H), 4.08 (dd, *J* = 4.0 Hz, 1H), 3.96–3.67 (m, 14 H), 3.59–3.42 (m, 6 H), 2.02 (s, 3 H), 1.16–1.14 (m, 3H); <sup>13</sup>C NMR (200 MHz, D<sub>2</sub>O) δ 174.80, 102.68, 101.61, 98.44, 98.33, 95.72, 92.01, 81.35, 81.27, 76.89, 75.51, 75.42, 75.26, 74.58, 74.39, 74.38, 73.38, 72.56, 72.26, 72.16, 71.82, 71.80, 70.83, 70.61, 70.56, 69.59, 69.58, 69.16, 69.10, 68.19, 68.15, 67.92, 67.89, 66.37, 66.33, 61.38, 61.35, 60.35, 59.69, 59.61, 55.51, 22.03, 15.11, 15.10. HRMS (ESI) *m/z* calculated for C<sub>26</sub>H<sub>45</sub>NNaO<sub>20</sub> [M+Na]<sup>+</sup> 714.2433, found 714.2430.

#### ***Synthesis of LNFP V (5) Galβ3GlcNAcβ3Galβ4(Fuc α3)Glc***

A reaction mixture (15 mL) in Tris-HCl buffer (100 mM, pH 8.0) containing tetrasaccharide Fuc-LNT II (**10**) (200 mg, 0.29 mmol), Gal (78 mg, 0.43 mmol), ATP (287 mg, 0.52 mmol), UTP (0.274 g, 0.52 mmol), MgCl<sub>2</sub> (20 mM), SpGalK (3.5 mg), BLUSP (3.0 mg), PmPpA (2.5 mg), and Cvβ3GalT (3.0 mg) was incubated in an incubator shaker at 30 °C for 48 h with shaking (100 rpm). The product formation was monitored by TLC (*n*-PrOH:H<sub>2</sub>O:NH<sub>3</sub>:H<sub>2</sub>O = 4:2:1, by volume, detected with *p*-anisaldehyde sugar stain) and MS. Upon completion of the reaction, pre-cooled ethanol (70 mL) was added and the mixture was incubated at 4 °C for 1 h. After centrifugation (4300 × *g*), the supernatant was concentrated and passed through a Bio-Gel P-2 gel filtration column (2.5 cm × 80 cm, water was used as an eluant) to produce pentasaccharide LNFP V (**5**) (242 mg, 98%). <sup>1</sup>H NMR (800 MHz, D<sub>2</sub>O) δ 5.49 (d, *J* = 4.0 Hz, 0.6 H), 5.43 (d, *J* = 4.0 Hz, 0.4 H), 5.24 (d, *J* = 4.0 Hz, 0.4 H), 4.88–4.83 (m, 1 H), 4.77 (d, *J* = 8.0 Hz, 1 H), 4.70 (d, *J* = 8.0 Hz, 0.6 H), 4.50 (d, *J* = 8.0 Hz, 1 H), 4.48 (d, *J* = 8.0 Hz, 1 H), 4.15 (d, *J* = 4.0 Hz, 1H), 4.03–3.75 (m, 19 H), 3.70 (dd, *J* = 4.0 and 10.4 Hz, 1H), 3.66–3.51 (m, 6 H), 2.07 (s, 3 H), 1.23–1.20 (m, 3H); <sup>13</sup>C NMR (200 MHz, D<sub>2</sub>O) δ 174.88, 103.41, 102.43, 101.68, 98.52, 98.40, 95.81, 92.08, 82.01, 81.48, 81.41, 77.01, 75.52, 75.35, 75.24, 75.14, 74.70, 74.47, 74.46, 72.66, 72.44, 72.40, 72.31, 71.91, 71.89, 70.94, 70.69, 70.65, 69.26, 69.20, 68.50, 68.44, 68.43, 68.22, 68.19, 68.02, 67.99, 66.44, 66.40, 61.43, 61.40, 60.98, 60.49, 59.80, 59.72, 54.66, 22.19, 15.18, 15.17. HRMS (ESI) *m/z* calculated for C<sub>32</sub>H<sub>55</sub>NNaO<sub>25</sub> [M+Na]<sup>+</sup> 876.2961, found 876.2970.

#### ***Synthesis of DiFuc-LNT (6) Fuc α2Galβ3GlcNAcβ3Galβ4(Fuc α3)Glc***

A reaction mixture (5 mL) in Tris-HCl buffer (100 mM, pH 7.5) containing LNFP V (**5**) (100 mg, 0.12 mmol), L-fucose (29 mg, 0.17 mmol), ATP (103 mg, 0.19 mmol), GTP (106 mg, 0.19 mmol), MgCl<sub>2</sub> (20 mM), BfFKP (1.0 mg), PmPpA (0.8 mg), and EcWbgL (0.3 mg) was incubated in an incubator shaker at 30 °C with shaking (100 rpm) until the reaction was completed as detected by TLC and MS. Pre-cooled ethanol (5 mL) was added and the mixture was incubated at 4 °C for 1 h. After centrifugation 4300 × *g*, the supernatant was concentrated and passed through a Bio-Gel P-2 gel filtration column (2.5 cm × 80 cm, water was used as an eluant) to produce hexasaccharide DiFuc-LNT (**6**) (116 mg, 99%). <sup>1</sup>H NMR (800 MHz, D<sub>2</sub>O) δ 5.40 (d, *J* = 4.0 Hz, 0.6 H), 5.35 (d, *J* = 4.0 Hz, 0.4 H), 5.17 (d, *J* = 4.0 Hz, 1 H), 5.16 (d, *J* = 4.0 Hz, 0.4 H), 4.83–4.79 (m, 2 H), 4.63 (d, *J* = 8.0 Hz, 1.6 H), 4.61 (d, *J* = 8.8 Hz, 0.5 H), 4.60 (d, *J* = 8.8 Hz, 0.5 H), 4.39 (d, *J* = 8.8 Hz, 1 H), 4.29–4.26 (m, 1H), 4.06 (d, *J* = 4.0 Hz, 1 H), 3.97 (t, *J*

= 9.6 Hz, 1 H), 3.95–3.43 (m, 27 H), 2.03 (s, 3 H), 1.22 (d,  $J = 6.4$  Hz, 1 H), 1.15–1.13 (m, 3H);  $^{13}\text{C}$  NMR (200 MHz,  $\text{D}_2\text{O}$ )  $\delta$  174.11, 103.10, 101.58, 100.12, 99.40, 98.50, 98.40, 95.74, 92.02, 81.06, 80.99, 77.02, 76.99, 76.55, 75.39, 75.27, 75.06, 74.93, 74.67, 74.30, 74.29, 73.35, 72.52, 72.05, 71.95, 71.82, 71.80, 71.76, 70.87, 70.85, 70.80, 69.28, 69.15, 69.10, 69.00, 68.43, 68.40, 68.35, 67.88, 67.85, 67.83, 66.36, 66.35, 66.32, 61.39, 61.36, 61.03, 60.25, 59.69, 59.62, 54.92, 22.01, 15.18, 15.16, 15.15. HRMS (ESI)  $m/z$  calculated for  $\text{C}_{38}\text{H}_{65}\text{NNaO}_{29}$   $[\text{M}+\text{Na}]^+$  1022.3540, found 1022.3556.

## References

- (1) Li, Y.; Yu, H.; Chen, Y.; Lau, K.; Cai, L.; Cao, H.; Tiwari, V. K.; Qu, J.; Thon, V.; Wang, P. G.; Chen, X. Substrate Promiscuity of N-Acetylhexosamine 1-Kinases. *Molecules* **2011**, *16*, 6396–6407.
- (2) Chen, Y.; Thon, V.; Li, Y.; Yu, H.; Ding, L.; Lau, K.; Qu, J.; Hie, L.; Chen, X. One-Pot Three-Enzyme Synthesis of UDP-GlcNAc Derivatives. *Chem. Commun.* **2011**, *47*, 10815–10817.
- (3) Lau, K.; Thon, V.; Yu, H.; Ding, L.; Chen, Y.; Muthana, M. M.; Wong, D.; Huang, R.; Chen, X. Highly Efficient Chemoenzymatic Synthesis of beta1-4-Linked Galactosides with Promiscuous Bacterial beta1-4-Galactosyltransferases. *Chem. Commun.* **2010**, *46*, 6066–6068.
- (4) Li, Y.; Xue, M.; Sheng, X.; Yu, H.; Zeng, J.; Thon, V.; Chen, Y.; Muthana, M. M.; Wang, P. G.; Chen, X. Donor Substrate Promiscuity of Bacterial beta1-3-N-Acetylglucosaminyltransferases and Acceptor Substrate flexibility of beta1-4-Galactosyltransferases. *Bioorg. Med. Chem.* **2016**, *24*, 1696–1705.
- (5) Chen, M.; Chen, L. L.; Zou, Y.; Xue, M.; Liang, M.; Jin, L.; Guan, W. Y.; Shen, J.; Wang, W.; Wang, L.; Liu, J.; Wang, P. G. Wide Sugar Substrate Specificity of Galactokinase from *Streptococcus pneumoniae* TIGR4. *Carbohydr. Res.* **2011**, *346*, 2421–2425.
- (6) Muthana, M. M.; Qu, J.; Li, Y.; Zhang, L.; Yu, H.; Ding, L.; Malekan, H.; Chen, X. Efficient One-Pot Multienzyme Synthesis of UDP-Sugars Using A Promiscuous UDP-Sugar Pyrophosphorylase from *Bifidobacterium longum* (BLUSP). *Chem. Commun.* **2012**, *48*, 2728–2730.
- (7) Yu, H.; Yu, H.; Karpel, R.; Chen, X. Chemoenzymatic Synthesis of CMP-sialic Acid Derivatives by a One-Pot Two-Enzyme System: Comparison of Substrate Flexibility of Three Microbial CMP-sialic Acid Synthetases. *Bioorg. Med. Chem.* **2004**, *12*, 6427–6435.
- (8) Sugiarto, G.; Lau, K.; Qu, J.; Li, Y.; Lim, S.; Mu, S.; Ames, J. B.; Fisher, A. J.; Chen, X. A Sialyltransferase Mutant with Decreased Donor Hydrolysis and Reduced Sialidase Activities for Directly Sialylating Lewis<sup>X</sup>. *ACS Chem. Biol.* **2012**, *7*, 1232–1240.
- (9) Yi, W.; Liu, X.; Li, Y.; Li, J.; Xia, C.; Zhou, G.; Zhang, W.; Zhao, W.; Chen, X.; Wang, P. G. Remodeling Bacterial Polysaccharides by Metabolic Pathway Engineering. *Proc. Natl. Acad. Sci. U. S. A.* **2009**, *106*, 4207–4212.
- (10) Yu, H.; Li, Y.; Wu, Z.; Li, L.; Zeng, J.; Zhao, C.; Wu, Y.; Tasnima, N.; Wang, J.; Liu, H.; Gadi, M. R.; Guan, W.; Wang, P. G.; Chen, X. *H. pylori* alpha1-3/4-Fucosyltransferase (Hp3/4FT)-Catalyzed One-Pot Multienzyme (OPME) Synthesis of Lewis Antigens and Human Milk Fucosides. *Chem. Commun.* **2017**, *53*, 11012–11015.
- (11) Zhao, C.; Wu, Y.; Yu, H.; Shah, I. M.; Li, Y.; Zeng, J.; Liu, B.; Mills, D. A.; Chen, X. The One-Pot Multienzyme (OPME) Synthesis of Human Blood Group H Antigens and A Human Milk Oligosaccharide (HMOS) with Highly Active *Thermosynechococcus elongates* alpha1-2-Fucosyltransferase. *Chem. Commun.* **2016**, *52*, 3899–3902.
- (12) Yu, H.; Santra, A.; Li, Y.; McArthur, J. B.; Ghosh, T.; Yang, X.; Wang, P. G.; Chen, X. Streamlined Chemoenzymatic Total Synthesis of Prioritized Ganglioside Cancer Antigens. *Org. Biomol. Chem.* **2018**, *16*, 4076–4080.

$^1\text{H}$  and  $^{13}\text{C}$  NMR spectra of LNT II (GlcNAc $\beta$ 3Gal $\beta$ 4Glc)

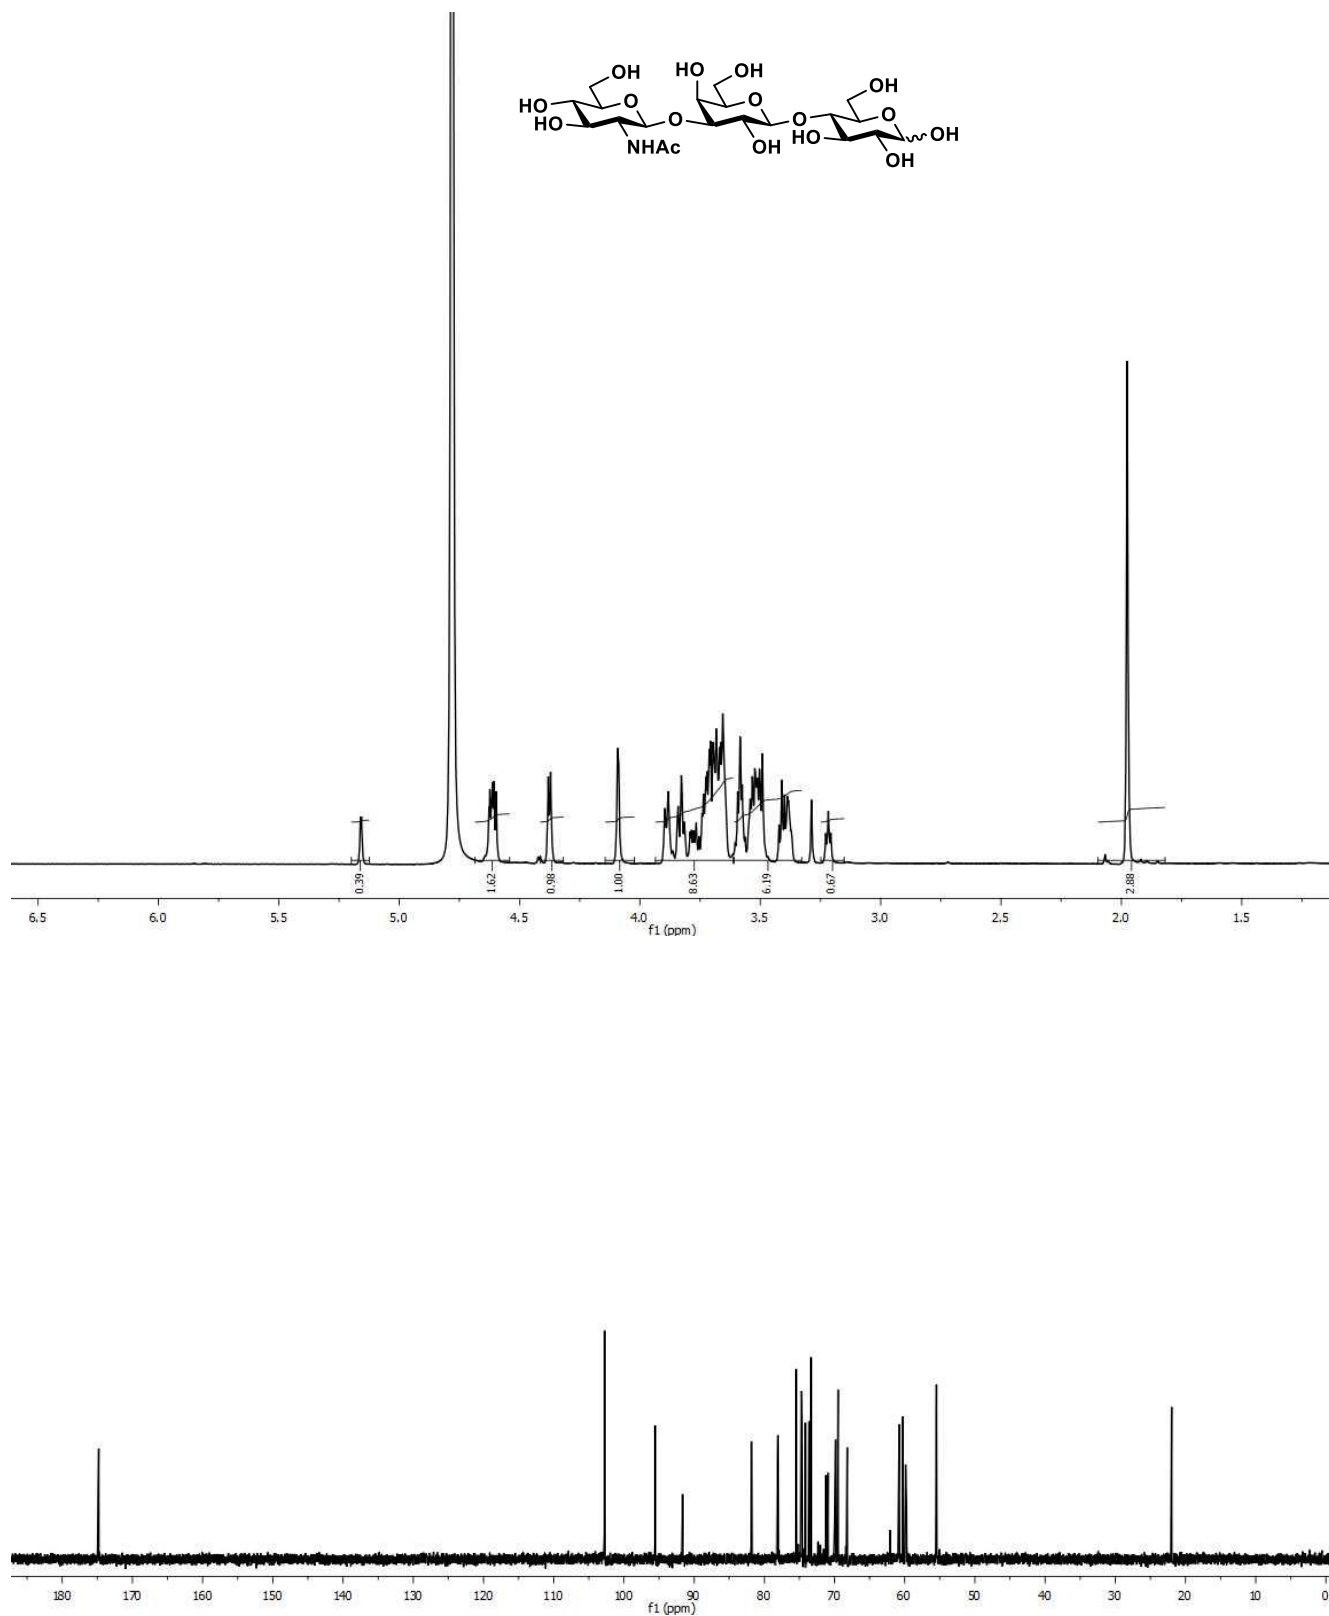

$^1\text{H}$  and  $^{13}\text{C}$  NMR spectra of LNT (1) Gal $\beta$ 3GlcNAc $\beta$ 3Gal $\beta$ 4Glc

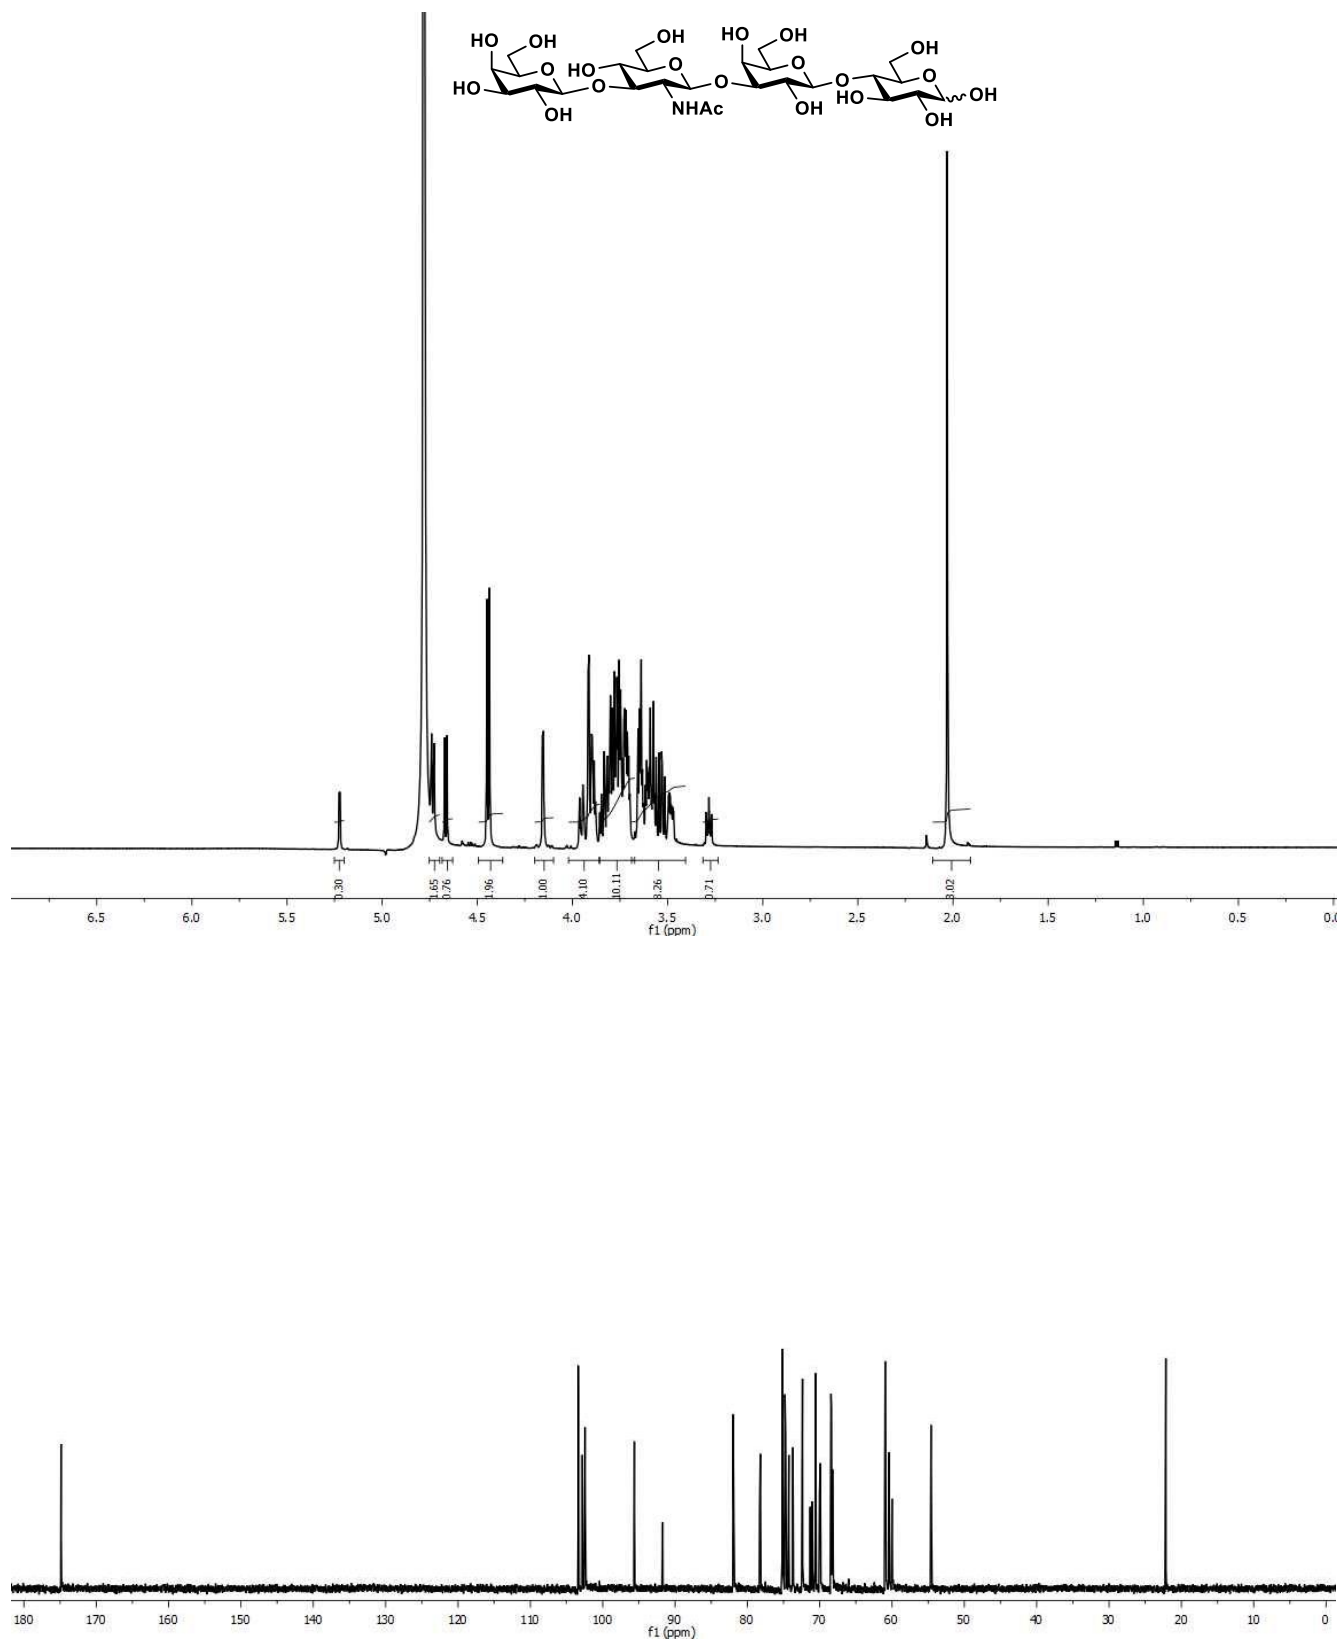

$^1\text{H}$  and  $^{13}\text{C}$  NMR spectra of LNFP II (2) Gal $\beta$ 3(Fuc $\alpha$ 4)GlcNAc $\beta$ 3Gal $\beta$ 4Glc

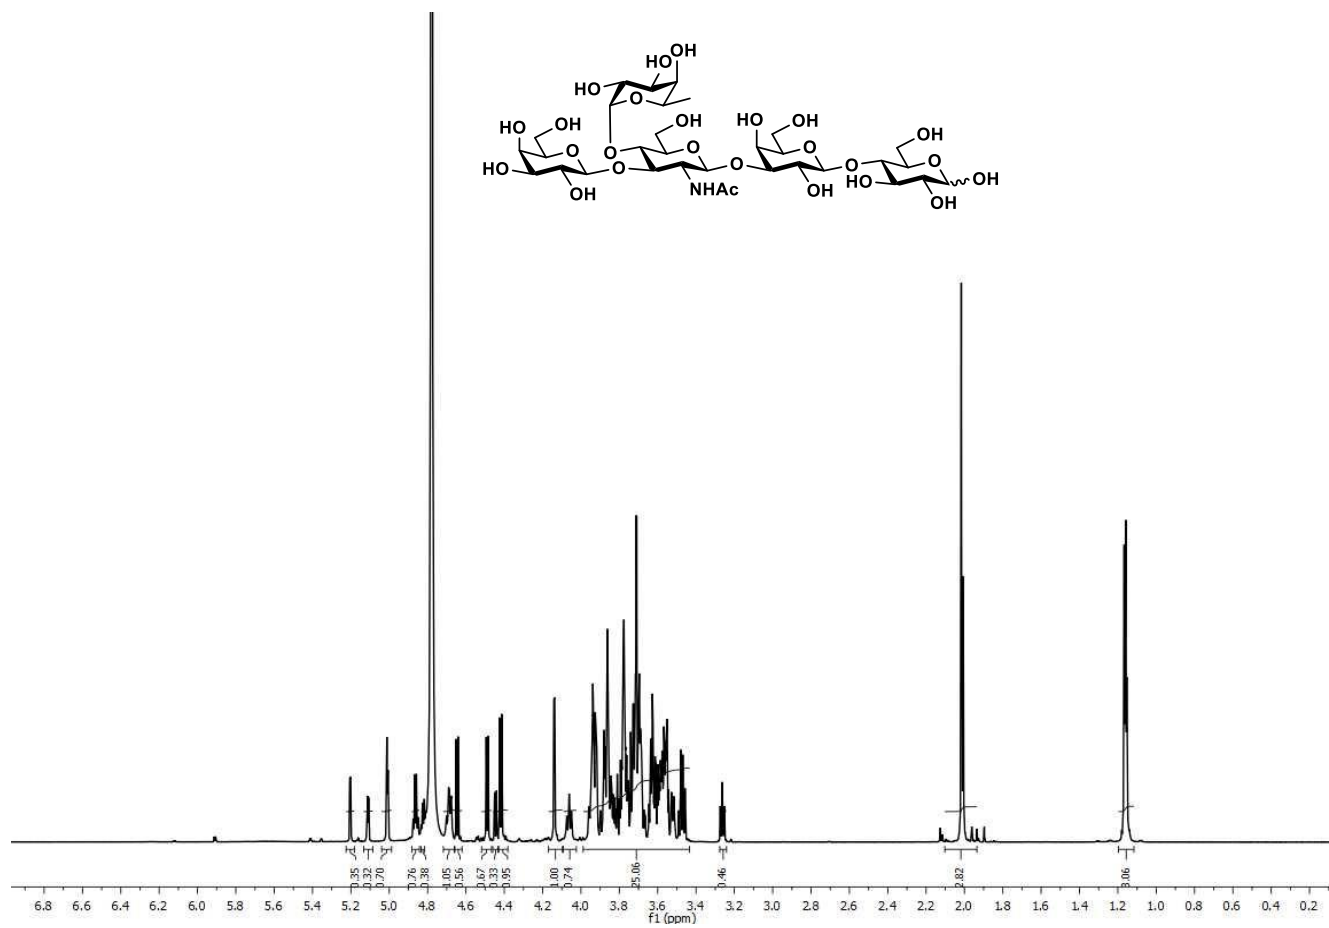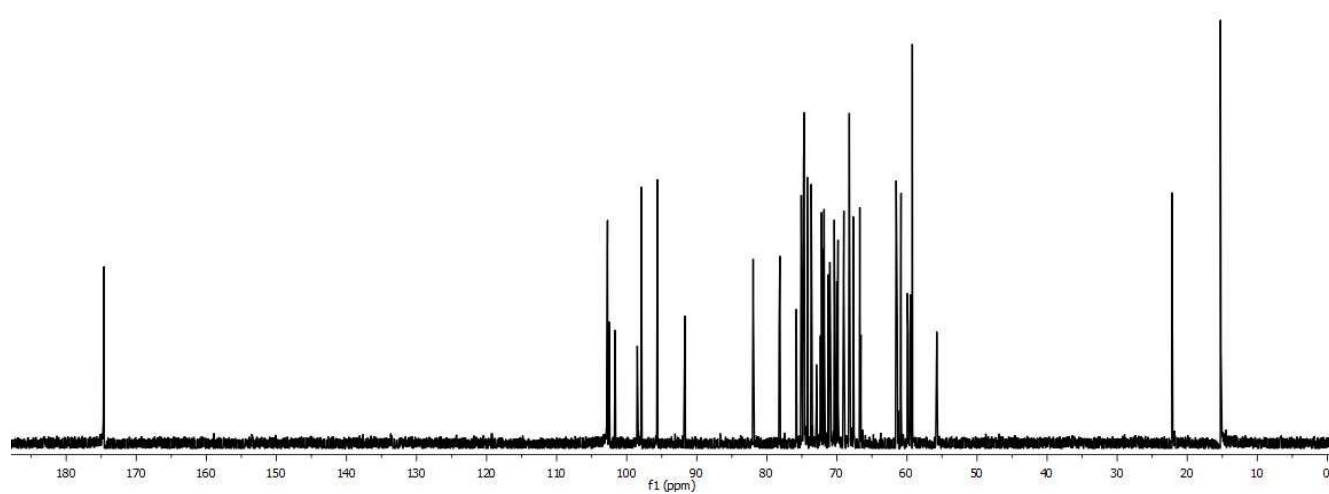

$^1\text{H}$  and  $^{13}\text{C}$  NMR spectra of S-LNF II (3) Neu5Ac $\alpha$ 3Gal $\beta$ 3(Fuc $\alpha$ 4)GlcNAc $\beta$ 3Gal $\beta$ 4Glc

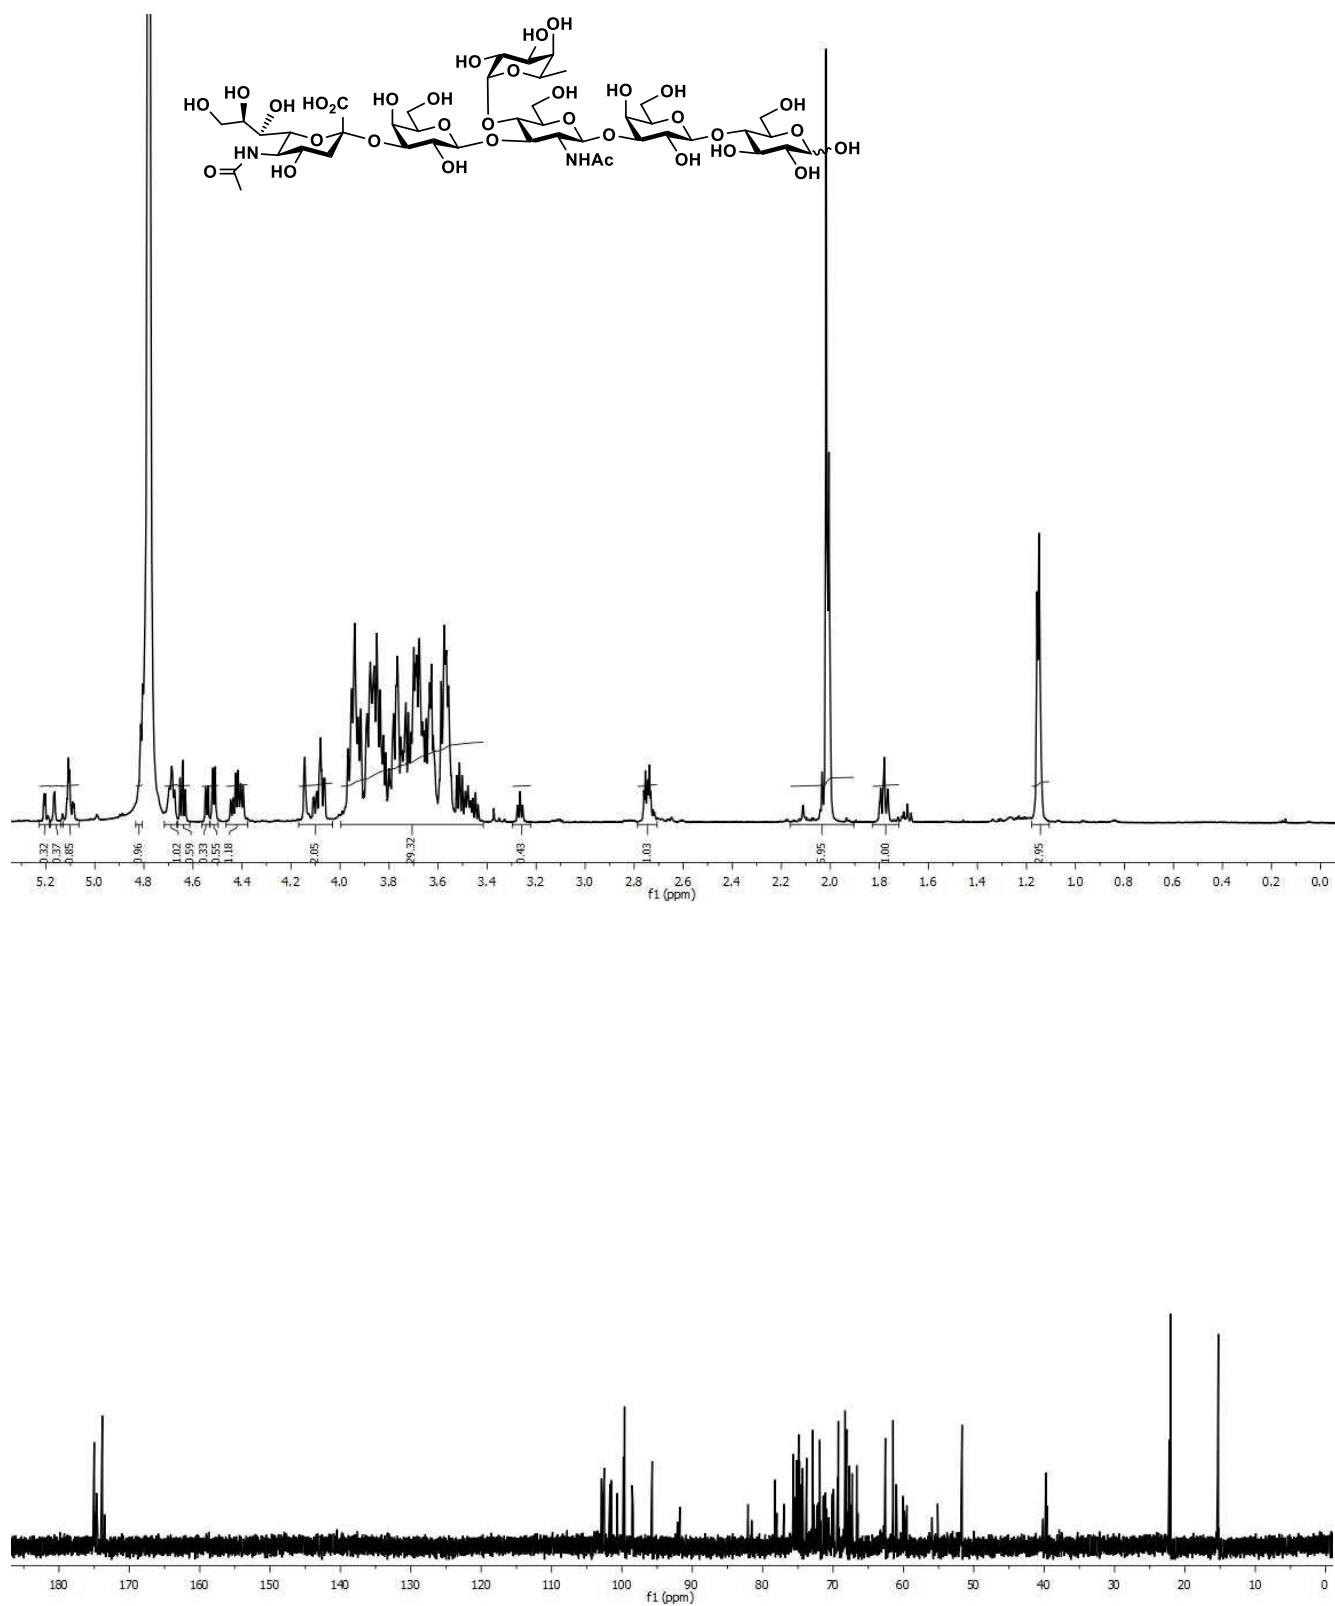

$^1\text{H}$  and  $^{13}\text{C}$  NMR spectra of LNDFH I (4)  $\text{Fuca}\alpha 2\text{Gal}\beta 3(\text{Fuca}\alpha 4)\text{GlcNAc}\beta 3\text{Gal}\beta 4\text{Glc}$

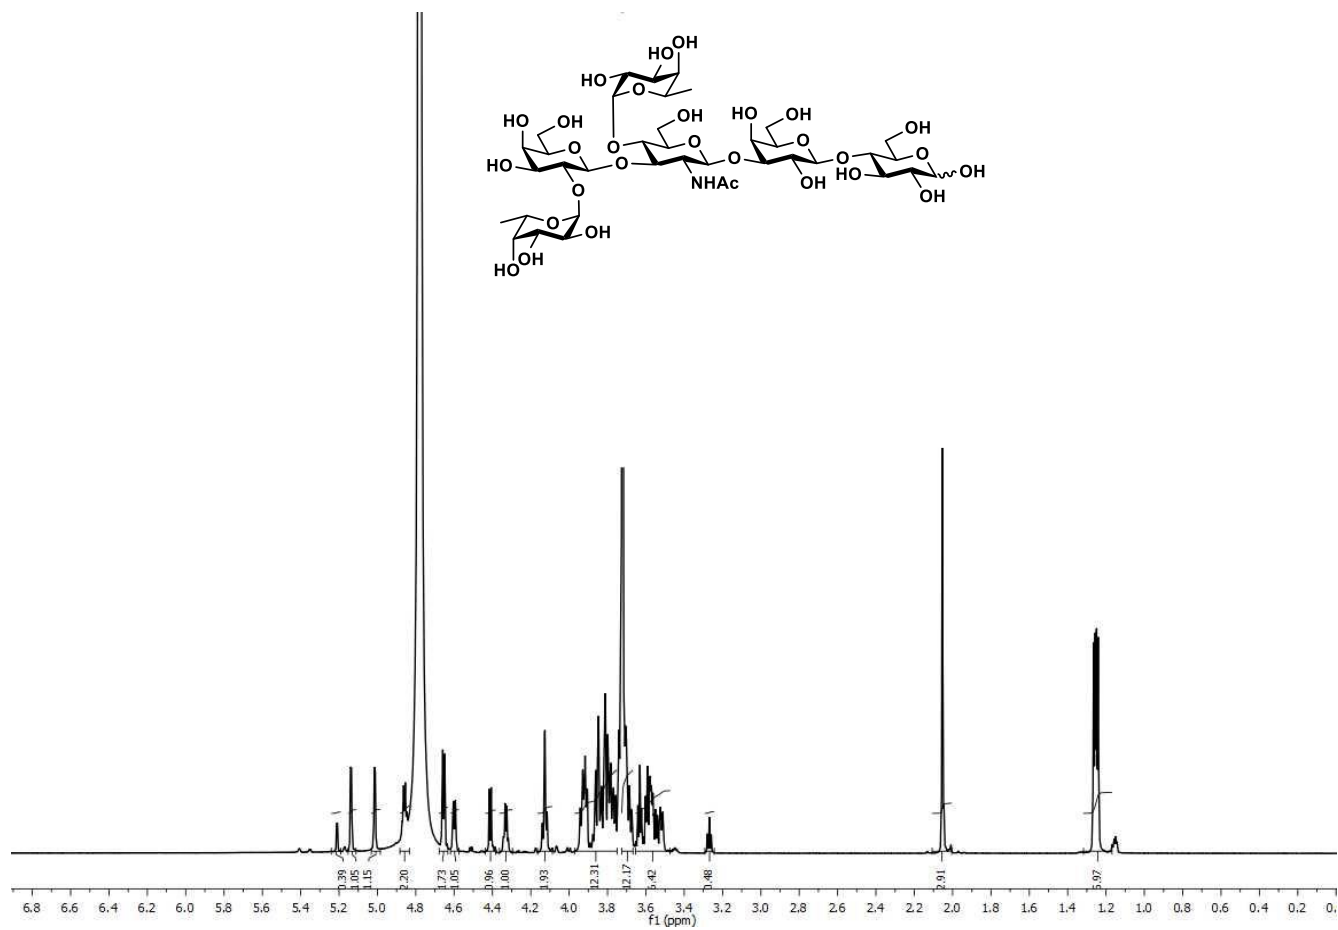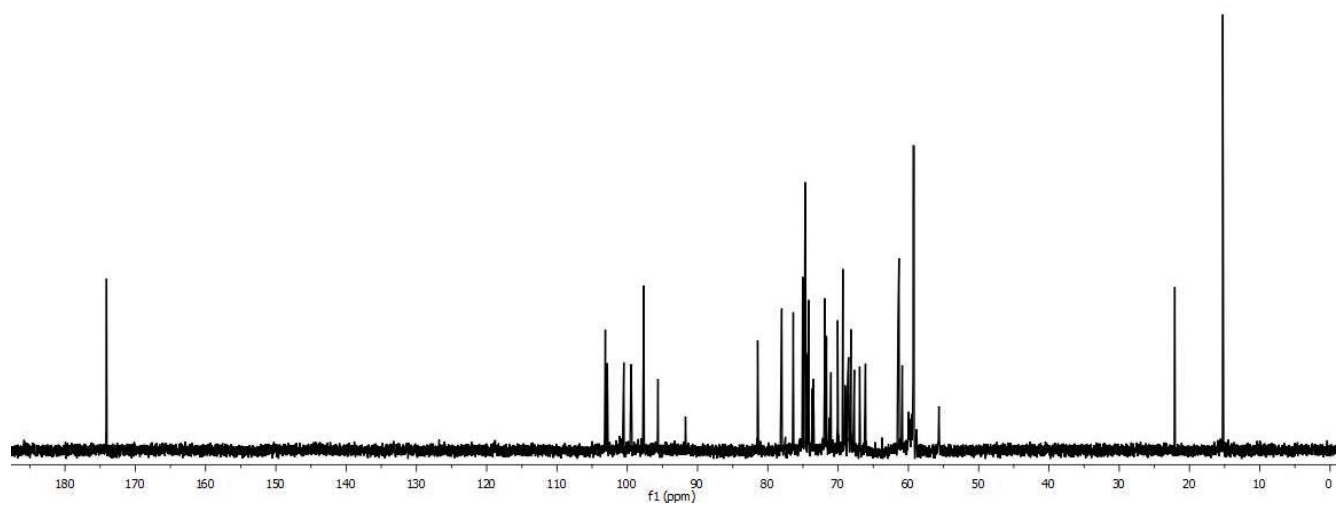





$^1\text{H}$  and  $^{13}\text{C}$  NMR spectra of DiFuc-LNT (6) Fuc $\alpha$ 2Gal $\beta$ 3GlcNAc $\beta$ 3Gal $\beta$ 4(Fuc $\alpha$ 3)Glc

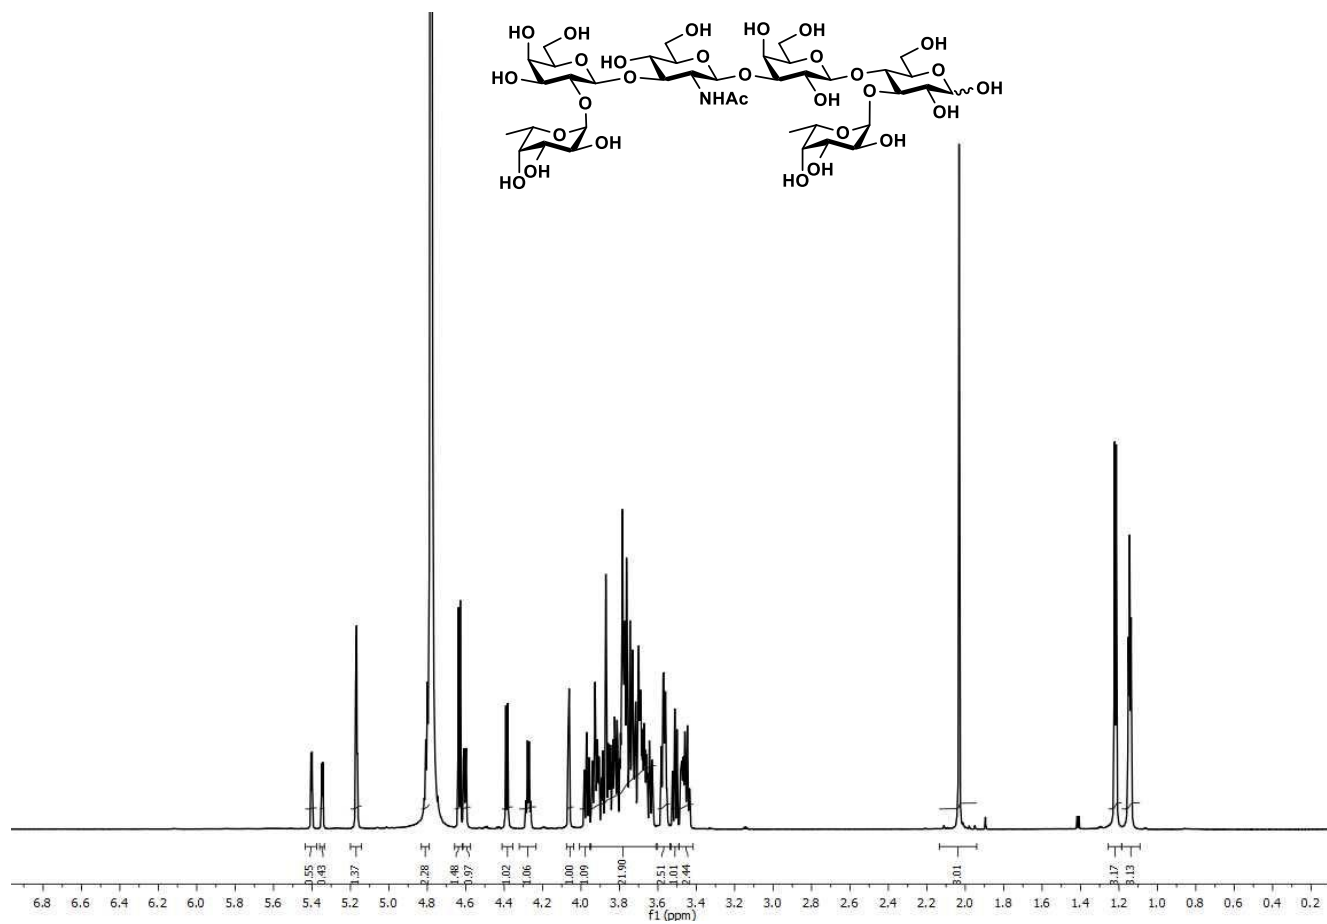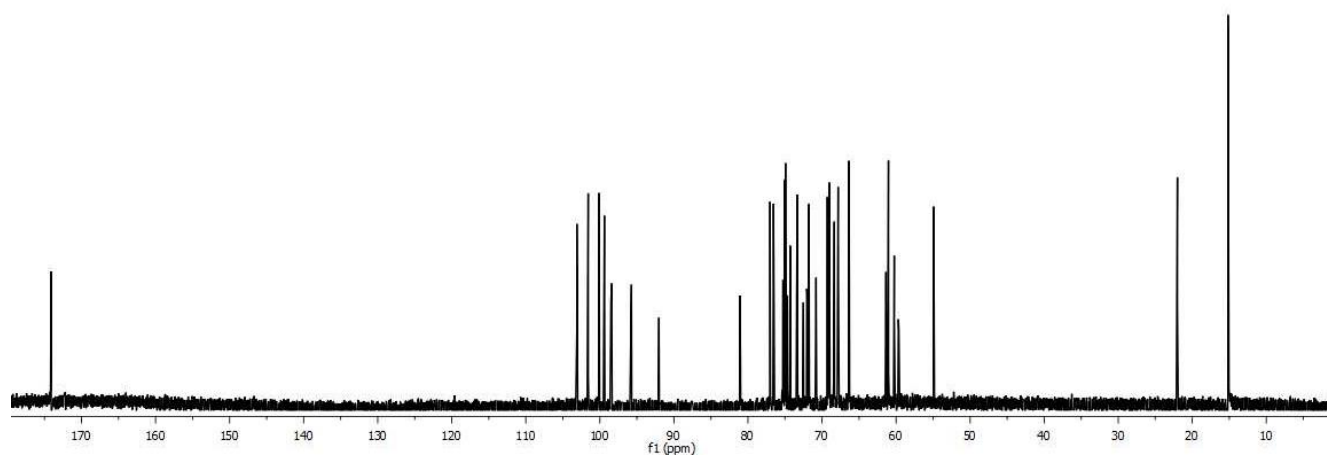

$^1\text{H}$  and  $^{13}\text{C}$  NMR spectra of Fuc-LNT II (**10**) GlcNAc $\beta$ 3Gal $\beta$ 4(Fuc $\alpha$ 3)Glc

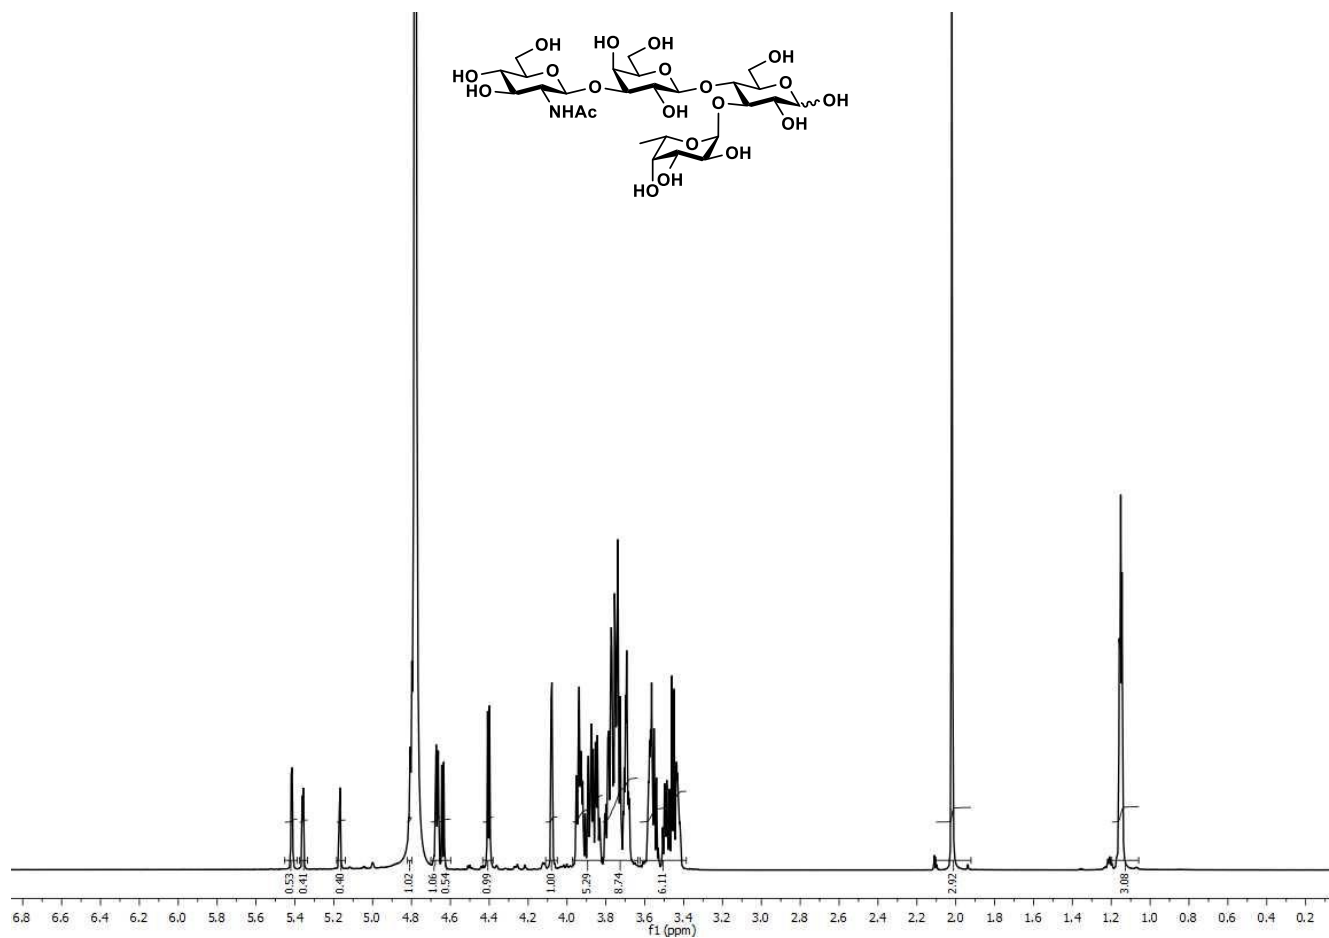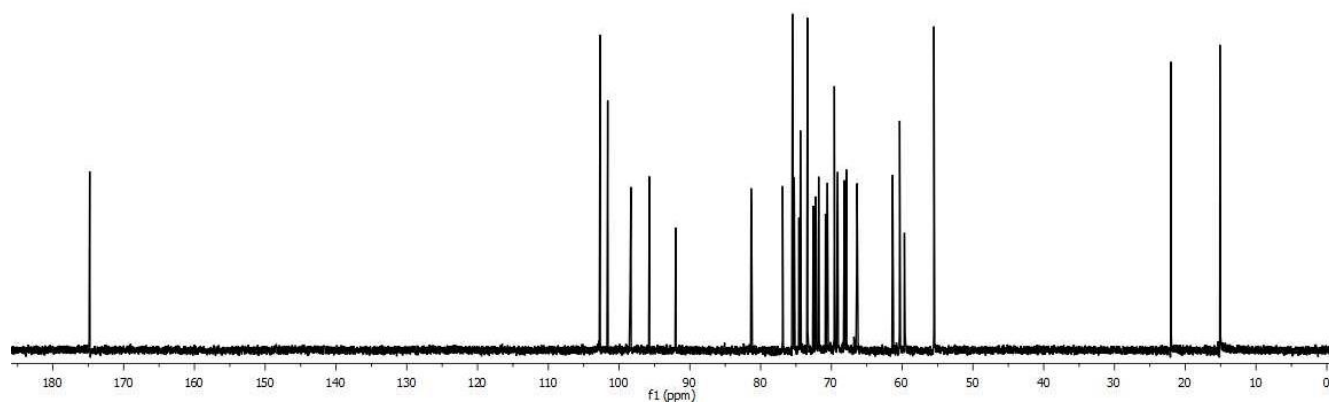

Supplement: NIHMS1579648-supplement-SI.pdf [file NIHMS1579648-supplement-SI.pdf]
